# Supplementary material for: Streptomyces colonosanans sp. nov., A Novel Actinobacterium Isolated from Malaysia Mangrove Soil Exhibiting Antioxidative Activity and Cytotoxic Potential against Human Colon Cancer Cell Lines
Source: PubMed Central journal article supplement (PMC5432915; doi:10.3389/fmicb.2017.00877), 2017-05-16
Supplement: Table1.pdf [file Table1.pdf]

## *Supplementary Material*

Jodi Woan-Fei Law<sup>1</sup>, Hooi-Leng Ser<sup>1</sup>, Acharaporn Duangjai<sup>2,3</sup>, Surasak Saokaew<sup>1,3,4</sup>, Sarah Ibrahim Bukhari<sup>5</sup>, Tahir Mehmood Khan<sup>1,6</sup>, Nurul-Syakima Ab Mutalib<sup>7</sup>, Kok-Gan Chan<sup>8</sup>, Bey-Hing Goh<sup>1,3\*</sup>, Learn-Han Lee<sup>1,3\*</sup>

<sup>1</sup>Novel Bacteria and Drug Discovery Research Group, School of Pharmacy, Monash University Malaysia, Bandar Sunway, Malaysia

<sup>2</sup>Division of Physiology, School of Medical Sciences, University of Phayao, Phayao, Thailand

<sup>3</sup>Center of Health Outcomes Research and Therapeutic Safety (Cohorts), School of Pharmaceutical Sciences, University of Phayao, Phayao, Thailand

<sup>4</sup>Faculty of Pharmaceutical Sciences, pharmaceutical Outcomes Research Center (CPOR), Naresuan University, Phitsanulok, Thailand

<sup>5</sup>Department of Pharmaceutics, College of Pharmacy, King Saud University, Riyadh, Saudi Arabia

<sup>6</sup>Department of Pharmacy, Absyn University Peshawar, Peshawar, Pakistan,

<sup>7</sup>UKM Medical Molecular Biology Institute (UMBI), UKM Medical Centre, University Kebangsaan Malaysia, Kuala Lumpur, Malaysia

<sup>8</sup>Division of Genetics and Molecular Biology, Institute of Biological Sciences, Faculty of Science, University of Malaya, Kuala Lumpur, Malaysia

\* **Correspondence:** Learn-Han Lee, Novel Bacteria and Drug Discovery Research Group, School of Pharmacy, Monash University Malaysia, 47500 Bandar Sunway, Selangor Darul Ehsan, Malaysia. lee.learn.han@monash.edu; leelearnhan@yahoo.com; Bey-Hing Goh, Novel Bacteria and Drug Discovery Research Group, School of Pharmacy, Monash University Malaysia, 47500 Bandar Sunway, Selangor Darul Ehsan, Malaysia. goh.bey.hing@monash.edu.

40 **Figure S1.** Maximum-likelihood tree based on almost complete 16S rRNA sequences (1490  
 41 nucleotides) showing relationship between strain MUSC 93J<sup>T</sup> and representatives of some other  
 42 related taxa. Bootstrap values (>50%) based on 1000 re-sampled datasets are shown at branch  
 43 nodes. Bar, 0.001 substitutions per site. Asterisks indicate that the corresponding nodes were also  
 44 recovered using neighbour-joining tree-making algorithms.  
 45

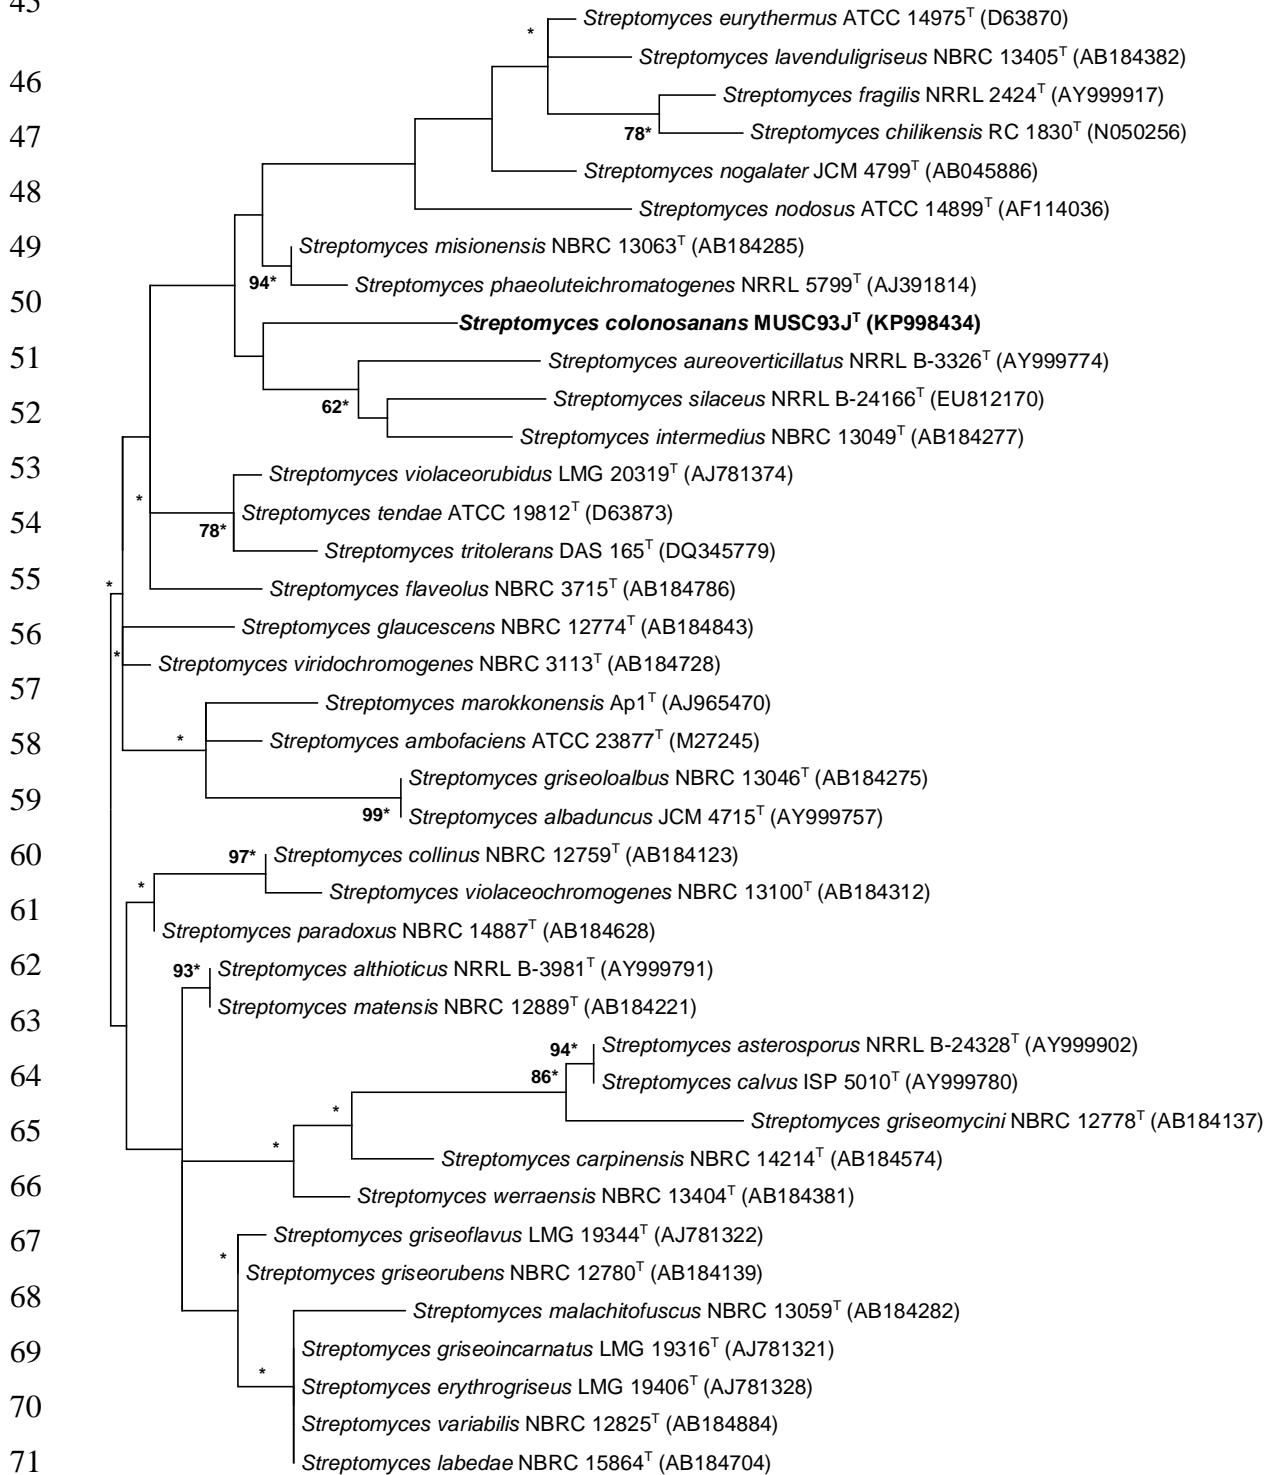

0.001

72 **Figure S2.** BOX-PCR comparison of strain MUSC 93J<sup>T</sup> and the closest related type strains.  
73 Strains: 1, *Streptomyces colonosanans* MUSC 93J<sup>T</sup>; 2, *Streptomyces malachitofuscus* JCM 4493<sup>T</sup>; 3,  
74 *Streptomyces misionensis* NBRC 13063<sup>T</sup>; 4, *Streptomyces phaeoluteichromatogenes* DSM 41898<sup>T</sup>; M,  
75 GeneRuler 1kb DNA ladder marker.

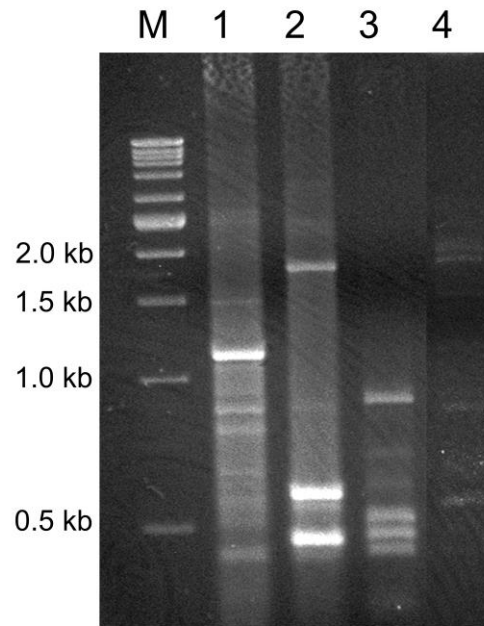

77 **Figure S3.** Two dimensional total lipid profile of strain MUSC 93J<sup>T</sup> and *Streptomyces*  
78 *malachitofuscus* JCM 4493<sup>T</sup>.

79 AL, aminolipid; DPG, diphosphatidylglycerol; PE, phosphatidylethanolamine; PGL, phosphoglycolipid; PI,  
80 phosphatidylinositol; PL, phospholipid; L, lipid.

81

82

83

84

85

86

87

88

89

90

91

92

93

94

95

96

97

98

99

100

101

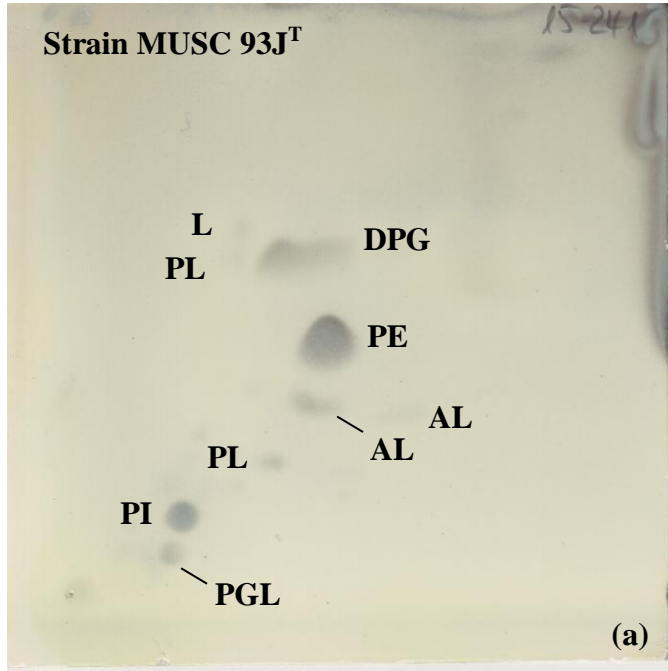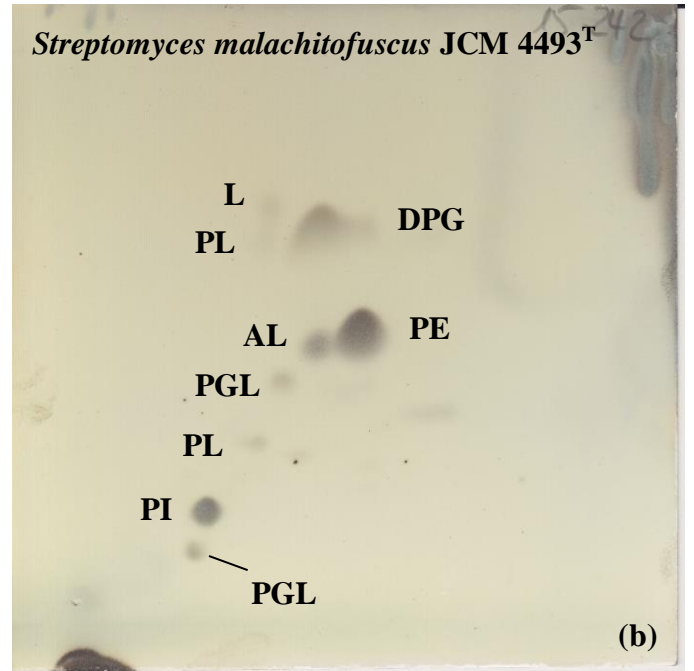

102 **Table S1.** Cultural characteristics of strain MUSC 93J<sup>T</sup> on different media at 28 °C after 7-14  
 103 days of incubation.

104 -, Not detected

| Medium                                  | Growth    | Colony color              |                       |
|-----------------------------------------|-----------|---------------------------|-----------------------|
|                                         |           | Aerial mycelium           | Substrate mycelium    |
| Yeast malt agar (ISP 2)                 | Good      | Light yellow              | Vivid yellow          |
| Oat Meal agar (ISP 3)                   | No growth | -                         | -                     |
| Inorganic Salt Starch agar (ISP 4)      | No growth | -                         | -                     |
| Glycerol Asparagine Agar Base (ISP 5)   | No growth | -                         | -                     |
| Peptone Yeast Extract Iron agar (ISP 6) | Good      | Moderate yellow           | Brilliant yellow      |
| Tyrosine agar base (ISP 7)              | No growth | -                         | -                     |
| <i>Streptomyces</i> agar                | Good      | Brilliant greenish yellow | Vivid greenish yellow |
| Starch casein agar                      | Moderate  | Greenish yellow           | Yellowish white       |
| Actinomycete isolation agar             | No growth | -                         | -                     |
| Nutrient agar                           | Weak      | Pale greenish yellow      | Yellowish white       |

105

106
